# Supplementary material for: Genetic Diversity of Montenegrin Local Sheep Breeds Based on Microsatellite Markers
Source: MDPI journal article supplement (doi:10.3390/ani12213029), 2022-11-03
Supplement: s1 [file s1]

**Supplement data:**

**Table S1.** Hardy–Weinberg (HW) equilibrium test in all studied microsatellite loci by breed.

| <b>Locus</b> | <b>JP</b>            | <b>SOR</b>          | <b>ZZ</b>           | <b>BAR</b>           | <b>LJAB</b>         | <b>SJ</b>           | <b>PIP</b>          |
|--------------|----------------------|---------------------|---------------------|----------------------|---------------------|---------------------|---------------------|
| AE129        | 0.221 <sup>ns</sup>  | 0.298 <sup>ns</sup> | 0.628 <sup>ns</sup> | 0.536 <sup>ns</sup>  | 0.883 <sup>ns</sup> | 0.323 <sup>ns</sup> | 0.864 <sup>ns</sup> |
| CP49         | 0.997 <sup>ns</sup>  | 0.006 <sup>**</sup> | 0.983 <sup>ns</sup> | 0.250 <sup>ns</sup>  | 0.714 <sup>ns</sup> | 0.650 <sup>ns</sup> | 0.746 <sup>ns</sup> |
| CSRD247      | 0.994 <sup>ns</sup>  | 0.983 <sup>ns</sup> | 0.605 <sup>ns</sup> | 0.007 <sup>*</sup>   | 0.646 <sup>ns</sup> | 0.601 <sup>ns</sup> | 0.783 <sup>ns</sup> |
| FCB20        | 0.410 <sup>ns</sup>  | 0.417 <sup>na</sup> | 0.939 <sup>ns</sup> | 0.299 <sup>ns</sup>  | 0.326 <sup>ns</sup> | 0.592 <sup>ns</sup> | 0.033 <sup>*</sup>  |
| HSC          | 0.986 <sup>ns</sup>  | 0.530 <sup>ns</sup> | 0.995 <sup>ns</sup> | 0.029 <sup>*</sup>   | 0.742 <sup>ns</sup> | 0.159 <sup>ns</sup> | 0.911 <sup>ns</sup> |
| ILSTS005     | 0.001 <sup>***</sup> | 0.814 <sup>ns</sup> | 0.991 <sup>ns</sup> | 0.000 <sup>***</sup> | 0.855 <sup>ns</sup> | 0.996 <sup>ns</sup> | 0.543 <sup>ns</sup> |
| ILSTS011     | 0.934 <sup>ns</sup>  | 0.434 <sup>ns</sup> | 0.989 <sup>ns</sup> | 0.216 <sup>ns</sup>  | 0.634 <sup>ns</sup> | 0.575 <sup>ns</sup> | 0.546 <sup>ns</sup> |
| INRA006      | 0.507 <sup>ns</sup>  | 0.990 <sup>ns</sup> | 0.998 <sup>ns</sup> | 0.003 <sup>**</sup>  | 0.996 <sup>ns</sup> | 0.708 <sup>ns</sup> | 0.249 <sup>ns</sup> |
| INRA023      | 0.803 <sup>ns</sup>  | 0.704 <sup>ns</sup> | 0.122 <sup>ns</sup> | 0.333 <sup>ns</sup>  | 0.138 <sup>ns</sup> | 0.845 <sup>ns</sup> | 0.876 <sup>ns</sup> |
| INRA049      | 0.681 <sup>ns</sup>  | 0.062 <sup>ns</sup> | 0.914 <sup>ns</sup> | 0.600 <sup>ns</sup>  | 0.227 <sup>ns</sup> | 0.706 <sup>ns</sup> | 0.804 <sup>ns</sup> |
| INRA063      | 0.112 <sup>ns</sup>  | 0.972 <sup>ns</sup> | 0.898 <sup>ns</sup> | 0.719 <sup>ns</sup>  | 0.741 <sup>ns</sup> | 0.002 <sup>**</sup> | 0.234 <sup>ns</sup> |
| INRA132      | 0.110 <sup>ns</sup>  | 0.566 <sup>ns</sup> | 0.896 <sup>ns</sup> | 0.000 <sup>***</sup> | 0.115 <sup>ns</sup> | 0.916 <sup>ns</sup> | 0.456 <sup>ns</sup> |
| INRA172      | 0.747 <sup>ns</sup>  | 0.470 <sup>ns</sup> | 0.733 <sup>ns</sup> | 0.960 <sup>ns</sup>  | 0.037 <sup>*</sup>  | 0.803 <sup>ns</sup> | 0.923 <sup>ns</sup> |
| MAF214       | 0.723 <sup>ns</sup>  | 0.802 <sup>ns</sup> | 0.377 <sup>ns</sup> | 0.012 <sup>*</sup>   | 0.939 <sup>ns</sup> | 0.018 <sup>**</sup> | 0.443 <sup>ns</sup> |
| MAF65        | 0.179 <sup>ns</sup>  | 0.292 <sup>ns</sup> | 0.831 <sup>ns</sup> | 0.002 <sup>**</sup>  | 0.942 <sup>ns</sup> | 0.174 <sup>ns</sup> | 0.642 <sup>ns</sup> |
| McM042       | 0.798 <sup>ns</sup>  | 0.972 <sup>ns</sup> | 0.842 <sup>ns</sup> | 0.987 <sup>ns</sup>  | 0.211 <sup>ns</sup> | 0.584 <sup>ns</sup> | 0.974 <sup>ns</sup> |
| SPS113       | 0.060 <sup>ns</sup>  | 0.116 <sup>ns</sup> | 0.811 <sup>ns</sup> | 0.336 <sup>ns</sup>  | 0.002 <sup>**</sup> | 0.970 <sup>ns</sup> | 0.505 <sup>ns</sup> |
| SPS115       | 1.000 <sup>ns</sup>  | 0.671 <sup>ns</sup> | 0.553 <sup>ns</sup> | 0.000 <sup>***</sup> | 0.003 <sup>**</sup> | 0.056 <sup>ns</sup> | 0.119 <sup>ns</sup> |

Abbreviations: JP—Jezeropivska, SOR—Sora, Zeta zuja—ZZ, Bardoka—BAR, Ljaba—LJAB, Sjenička—SJ, Piperska zuja—PIP. Significant *p* values: ns = not significant, \* *p* < 0.05, \*\* *p* < 0.01, \*\*\* *p* < 0.001.
